# Supplementary material for: A within-host model of SARS-CoV-2 infection
Source: bioRxiv or medRxiv preprint supplement (doi:10.1101/2022.04.22.22274137), 2022-04-22
Supplement: Supplementary file [file media-1.pdf]

## Supplementary Figures

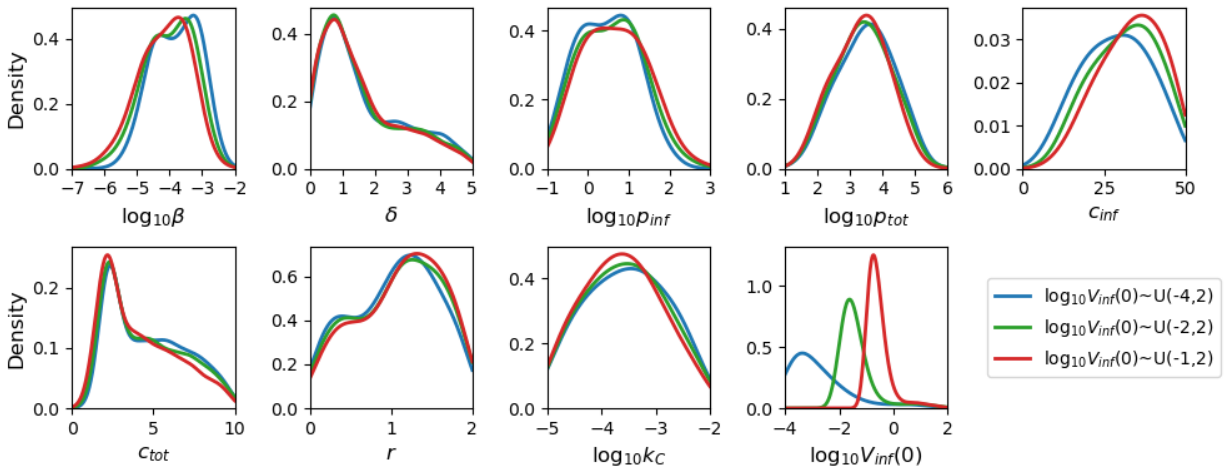

**Figure S1: Comparison of  $V_{inf}(0)$  prior distributions:** Approximate posterior distributions for model parameters inferred using an ABC-SMC algorithm with different prior distributions for the initial concentration of infectious virus.

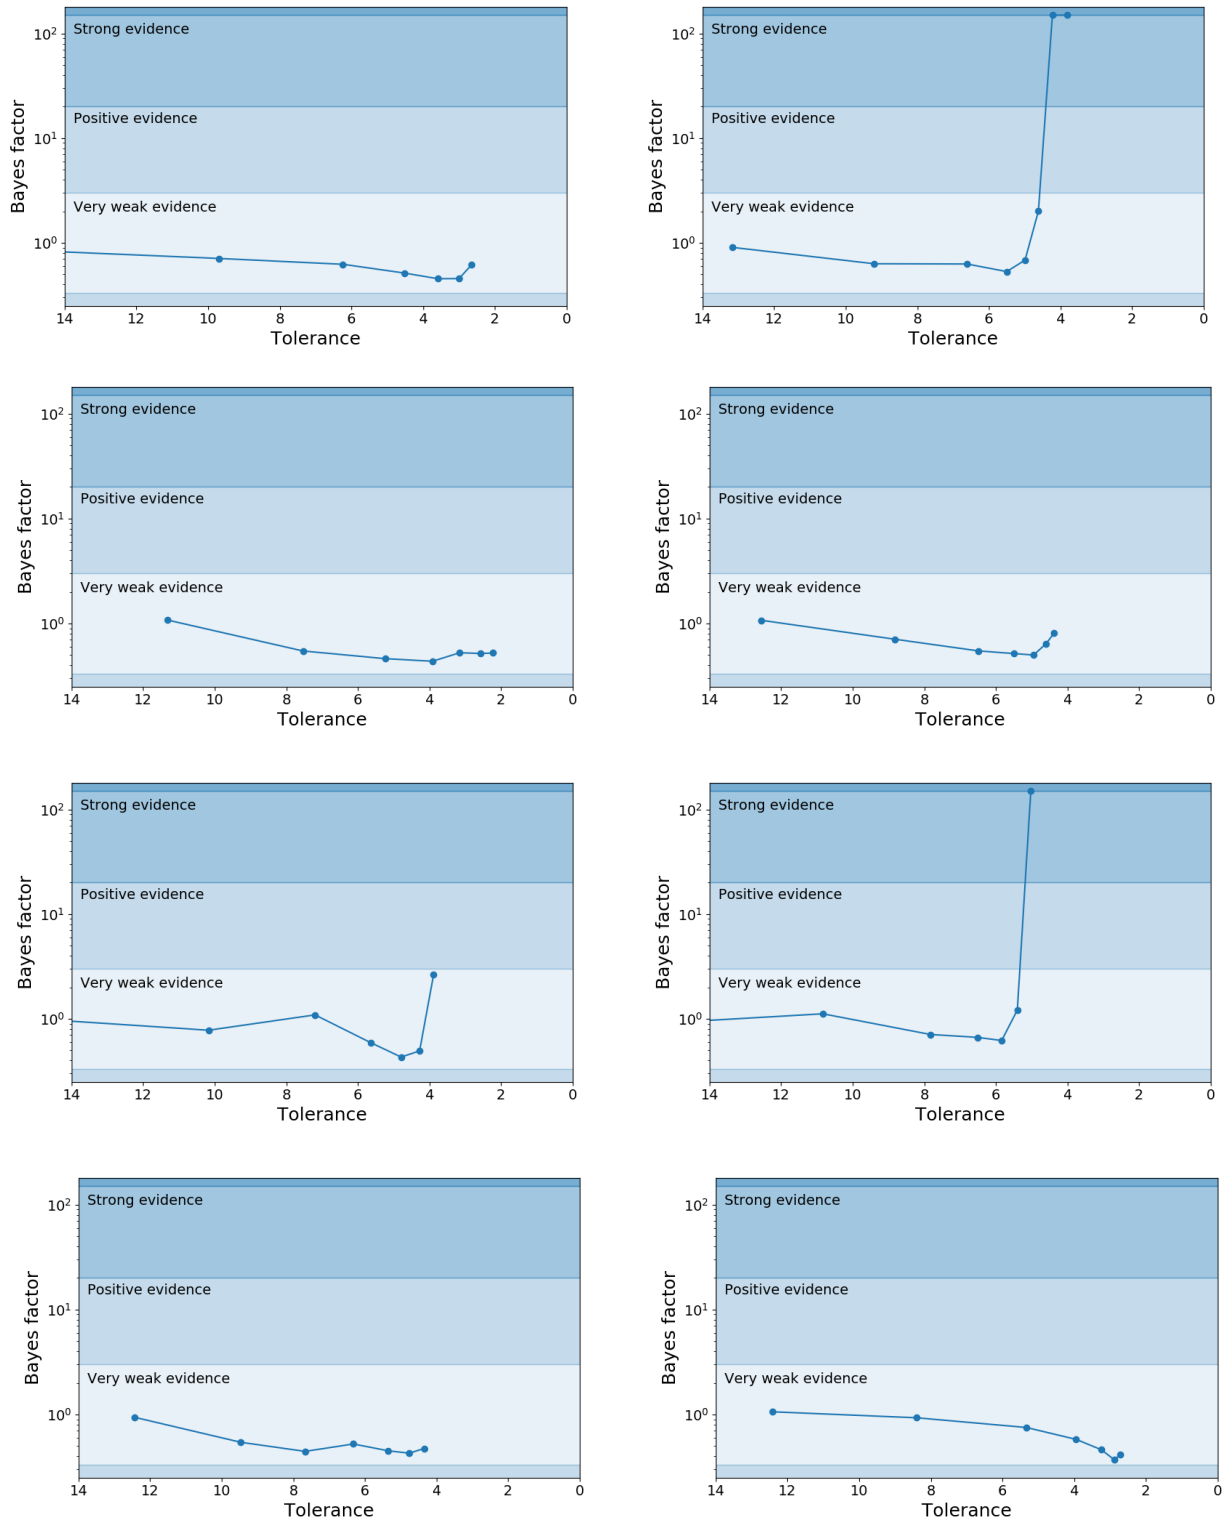

**Figure S2a: ABC-SMC model selection:** The Bayes factor is plotted against the tolerance for each generation of the ABC-SMC model selection algorithm. The strength of the evidence in favour of a model with an immune response is also indicated. For each participant, the sequence of tolerances is the same as that obtained from the ABC-SMC parameter inference.

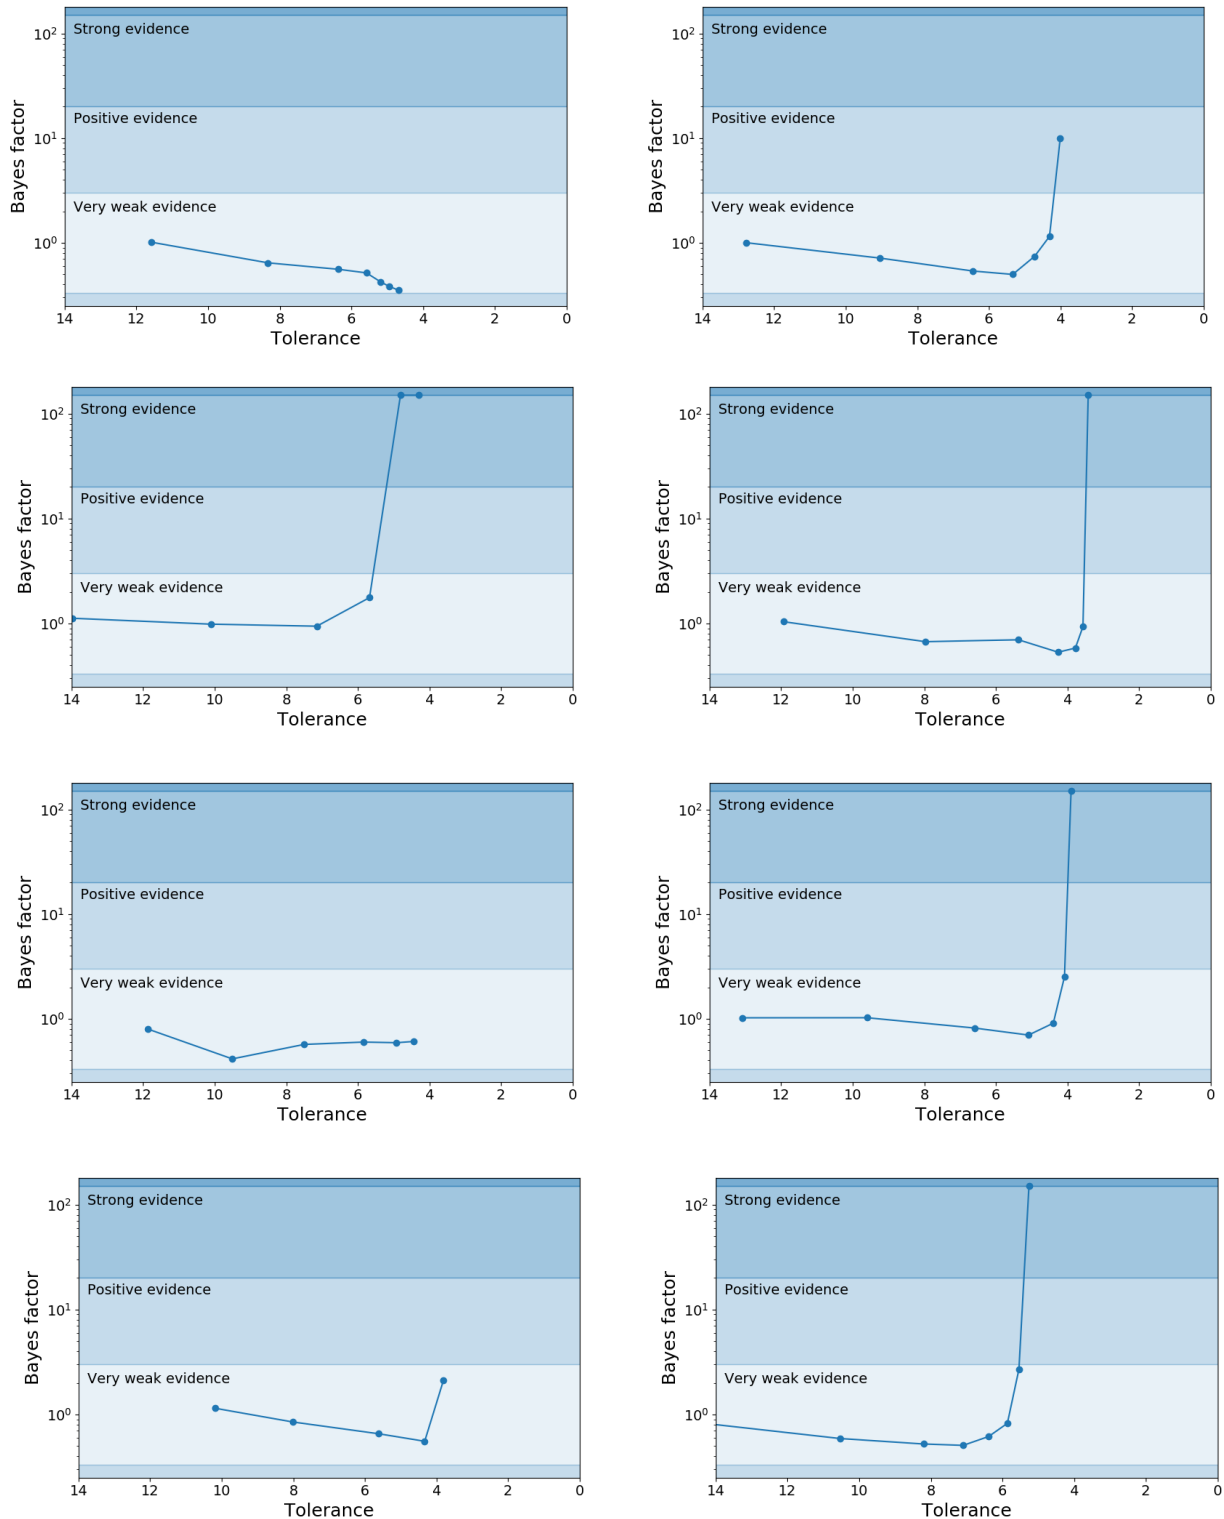

**Figure S2b: ABC-SMC model selection:** The Bayes factor is plotted against the tolerance for each generation of the ABC-SMC model selection algorithm. The strength of the evidence in favour of a model with an immune response is also indicated. For each participant, the sequence of tolerances is the same as that obtained from the ABC-SMC parameter inference.
